# Supplementary material
Source: PubMed Central journal article supplement (PMC4106706)
Supplement: NIHMS602550-supplement-Supplemental.pdf [file NIHMS602550-supplement-Supplemental.pdf]

# Supplementary Figure 1

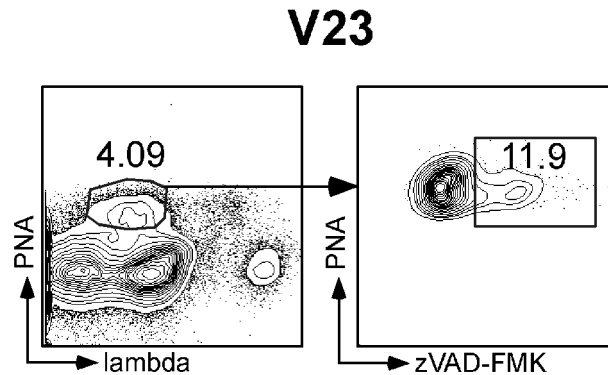

**Supplementary Figure 1.** The frequency of V23  $\lambda^-$  (i.e.  $\kappa^+$ ) GC B cells undergoing apoptosis is  $\sim 3$ -fold lower than  $\lambda^+$  B cells in the same animals and similar to  $\lambda^+$  B cells in B1-8 GCs. Representative flow cytometric profile of spleen cells from a V23 mouse that had been immunized with NP-CGG 13 days earlier stained with PNA,  $\lambda$ , and ZVAD-FMK-FITC. The  $\lambda^-/PNA^+$  population is gated in the left histogram and presumably contains  $\kappa^+$  B cells specific for CGG epitopes. The percentage of zVAD-FMK binding cells (i.e. apoptotic cells) was determined by the plot on the right. The average ( $n=3$ ) was  $9.3 \pm 1.2\%$ , with the mouse depicted having 11.9% positive cells.

## Supplementary Figure 2

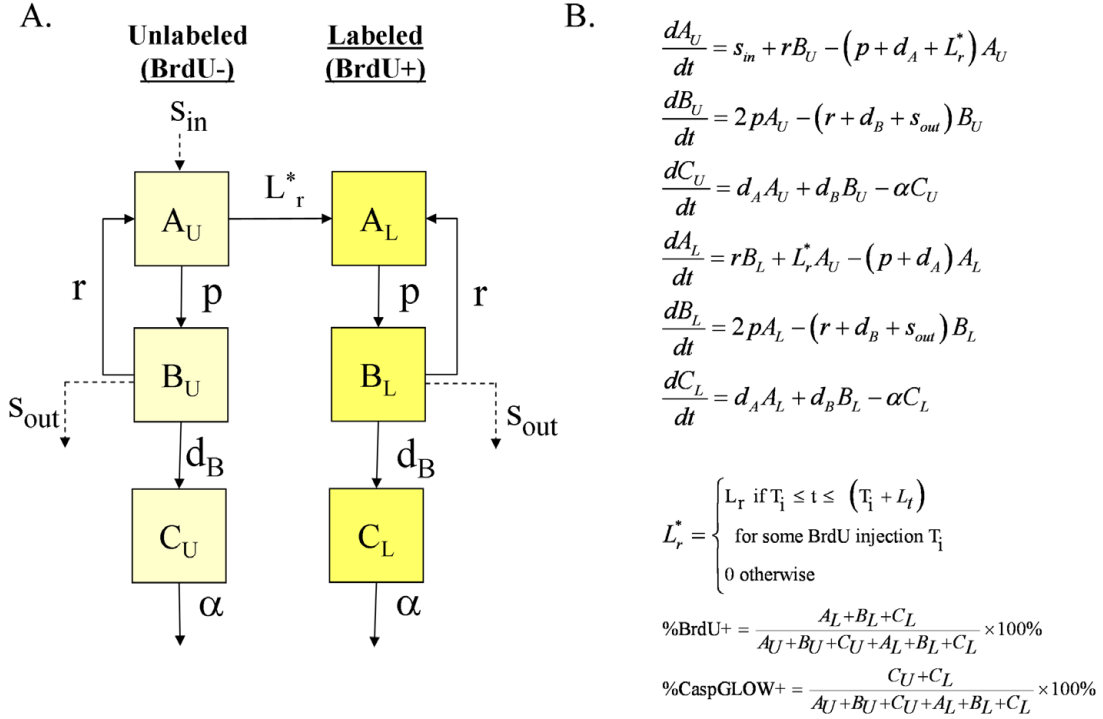

### Supplementary Figure 2. Mathematical model of GC cell turnover.

(A) Overview of model structure showing the three B cell subsets: Subset A (dividing cells, ~S/G2/M phases), Subset B (non-dividing cells, ~G0/G1 phases) and Subset C (CaspGLOW+, dying cells). The subscripts in each subset name indicate if the cells are unlabeled (U) or BrdU labeled (L). Descriptions for each parameter are provided in Supplementary Table 2. (B) Differential equations implementing the model of GC population dynamics.

## Supplementary Figure 3

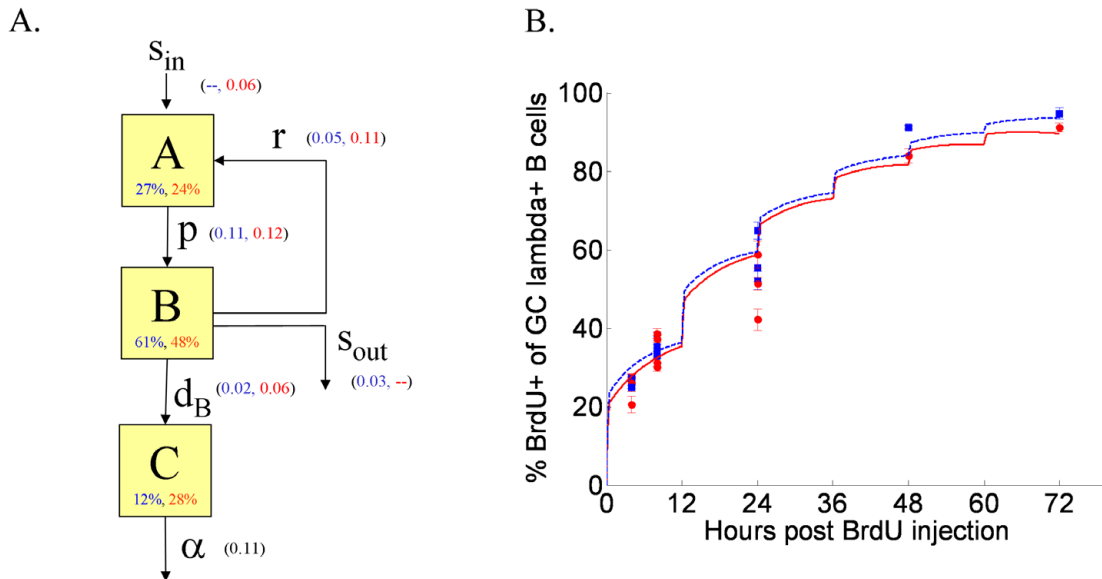

**Supplementary Figure 3. Mathematical modeling of GC cell turnover including inflow and outflow.** (A) Depiction of model scheme and parameters. Estimated parameter values are shown in parenthesis (B1-8, V23), as are the steady-state relative population sizes for each of the compartments. As discussed in the text, this extends the basic model by allowing for either inflow or outflow of cells from the GC. (B) Optimal fit of the model to the experimental BrdU and CaspGLOW labeling data (see Supplementary Table 2 for parameter values). Red squares are the B1-8 experimental data, while blue circles are the V23 experimental data (from Figure 4). The total population size was constrained to be constant (i.e., the population is at steady-state).

# Supplementary Table 1

| Tree Name            | Mouse |                 | Day | Tree notation                                                                                                                     |
|----------------------|-------|-----------------|-----|-----------------------------------------------------------------------------------------------------------------------------------|
|                      | Type  | Sampling Method |     |                                                                                                                                   |
| L2039_6p3t.1         | V23   | Laser           | 10  | (~1:LV1J1;CACAGCTGG~(~4:A353T~(~1:C233G~(~1:A164T~1:G166A,1:C12T:C38T)),1:C348T))<br>(~3:REA02+LV1J1;CATGGCTGG~1:A179G:G148A:G145 |
| L2039_6p3t.2         | V23   | Laser           | 10  | A)                                                                                                                                |
| L2039_7p.2           | V23   | Laser           | 10  | (~1:LV1J1;CATAGCTGG~2:A353T:G232A:G145A)                                                                                          |
| L2039_7p.3           | V23   | Laser           | 10  | (~1:LV1J1;CATTTCTGG~2:C357T:A139C)<br>(~10:KC02+KC03+KC04+KC05+KC07+KC09+KC10+KC1                                                 |
| L2079_5p.1           | V23   | Laser           | 10  | 2+LV1J1;CACTGG~1:A289T)<br>(~1:LV1J1;CACAGCTGG~1:C354A:T323A:A268T:T216A:                                                         |
| L2079_8p.1           | V23   | Laser           | 10  | C140T)<br>(~4:KD09+KD12+LV1J1;CATTTCTGG~1:C335G:C233T:C                                                                           |
| L2079_8p.2           | V23   | Laser           | 10  | 4G,1:A97G)                                                                                                                        |
| L2081_5p.1           | V23   | Laser           | 10  | (~4:KE04+KE07+LV1J1;CATTGG~1:C168A:C167T)<br>(~1:LV1J1;CATTTAAGCTGG~(~0:A358G~1:A321T,(~0:C                                       |
| L2081_5p.2           | V23   | Laser           | 10  | 167T~(~1:A213G~(~1:C187G:T167C:T126C~2:C140T)),3:<br>10 C168A)))                                                                  |
| L2081_7p.1           | V23   | Laser           | 10  | (~1:LV1J1;CATTGGGACTGG~1:A326T:A210C,1:A350G)                                                                                     |
| L2081_7p.2           | V23   | Laser           | 10  | (~1:LV1J1;CATTGGGGCTGG~1:C348T,1:A210C)<br>(~3:KF12+LV1J1;CTCTCCTGG~1:G347T:A202T:A154C:                                          |
| L2081_7p.3           | V23   | Laser           | 10  | G70A:A34C)<br>(~1:LV1J1;CACAGCTGG~(~0:C354A~4:A349G,1:G145A:                                                                      |
| L2086_6p.1           | V23   | Laser           | 10  | A112G))                                                                                                                           |
| L2086_6p.2           | V23   | Laser           | 10  | (~1:LV1J1;CATAGCTGG~(~2:A353T~1:G301A:G347A))                                                                                     |
| L2086_6p.3           | V23   | Laser           | 10  | (~1:LV1J1;CATTTCTGG~1:T343G)<br>(~2:LV1J1;CACTGG~(~1:C284T:T219A:G218C~(~1:C167                                                   |
| L11920d10_2Bprint.1  | V23   | Laser           | 10  | T:G158A:G148A~5:T39C)))                                                                                                           |
| L11920d10_2Bprint.2  | V23   | Laser           | 10  | (~1:LV1J1;CTTTGG~1:A349T)<br>(~2:LV1J1;CATGGGGCTGG~2:G232C,2:A170G,2:A224                                                         |
| L11920d10_3A1print.1 | V23   | Laser           | 10  | G:G137A,1:T105A:G67T:T36C)<br>(~1:LV1J1;CATATG~4:A355G:G232C:A227T:T156A:G14                                                      |
| L11920d10_3A2print.1 | V23   | Laser           | 10  | 5T:A111C:G75T)                                                                                                                    |
| L11922d10_1A2print.1 | V23   | Laser           | 10  | (~2:LV1J1;ATTTGG~(~3:A349T~1:A139G))                                                                                              |
| L11922d10_1A2print.2 | V23   | Laser           | 10  | (~1:LV1J1;ATTTGG~2:A139G)                                                                                                         |
| L11922d10_5Bprint.2  | V23   | Laser           | 10  | (~1:LV1J1;ATTTGG~10:A349T)                                                                                                        |
| L11922d10_5Bprint.3  | V23   | Laser           | 10  | (~1:LV1J1;CTTTGG~1:A349T)<br>(~1:LV1J1;CTCTGG~1:C351T:A349T:C335T:A223G:A183                                                      |
| 11929d16_2print.1    | V23   | Laser           | 16  | G:A170G:C140T)<br>(~1:LV1J1;CTTTGG~(~0:A349T~1:G70A,(~0:A114G~1:C                                                                 |
| 11929d16_2print.2    | V23   | Laser           | 16  | 348T,2:A170G:C121G),(~0:A170C~1:C225A:A182G,1:A2                                                                                  |
| 11929d16_2print.3    | V23   | Laser           | 16  | 27G:C171T,(~1:G347A:G158C:A154T:A124T~1:A278G:A                                                                                   |
| 11929d16_2print.4    | V23   | Laser           | 16  | 372G))))))<br>(~1:LV1J1;CTTTGG~1:G347A:G241A:G238A:A213T)                                                                         |
|                      |       |                 | 16  | (~1:LV1J1;CTTTGG~1:G215C:G137A:G70A:G32A:G19A)                                                                                    |

|                    |      |       |                                                                                                                                                                                    |
|--------------------|------|-------|------------------------------------------------------------------------------------------------------------------------------------------------------------------------------------|
| 11929d16_2print.5  | V23  | Laser | 16 (~1:LV1J1;CTTTGG~1:G232A:C178T:A22T)                                                                                                                                            |
| 11929d16_3print.1  | V23  | Laser | 16 (~1:LV1J1;CTTTGG~(~4:G241A~2:A344G))                                                                                                                                            |
| 11929d16_3print.2  | V23  | Laser | 16 (~1:LV1J1;CTTTGG~1:A373G:G145A)<br>(~1:LV1J1;CTTTGG~(~1:A170C:G158C~(~1:C233G~1:C9<br>16 8T:A349T:C345T:A273C:C228T:G233T)))                                                    |
| 11929d16_3print.3  | V23  | Laser | 16 (~1:LV1J1;CTTTGG~1:T315C:G232A:A164T)                                                                                                                                           |
| 11930d16_4print.1  | V23  | Laser | (~1:LV1J1;ATTTGG~(~0:A349T~1:G347A:A297C:A170G:<br>A34T,(~0:A170C:G158C~1:G45A,(~0:G145C~1:A202T:A1<br>57G:T105G,1:A180G),(~1:A237G:C233A:C229A:C228T:A<br>16 213C:A29C~2:A211G))) |
| 11930d16_4print.2  | V23  | Laser | (~1:LV1J1;CTTTGG~1:A349T:A185G:G145A:A139C:G73<br>16 A)                                                                                                                            |
| 11930d16_4print.3  | V23  | Laser | 16 (~1:LV1J1;CTCTGG~2:A349T:C345T:C187G)                                                                                                                                           |
| 11953d16_2Aprint.1 | V23  | Laser | (~1:LV1J1;CTTGGG~(~0:A349T~1:A258C:A182G,(~0:A2<br>10G:A170C~1:C235T,1:G19A,1:T197C:C167T:T85G:A84<br>16 G)))                                                                      |
| 11953d16_2Aprint.2 | V23  | Laser | (~1:LV1J1;CCTGGGGGCTGG~(~1:G334A:A278G~1:A27<br>16 5T))                                                                                                                            |
| 11953d16_2Aprint.3 | V23  | Laser | 16 (~1:LV1J1;CATTTG~(~1:G362T~1:A170C:A210G))                                                                                                                                      |
| 11953d16_2Aprint.4 | V23  | Laser | (~1:LV1J1;CTCTGG~(~0:A349T~1:G334C:T150G,1:C228<br>16 G,(~1:A170G~1:A112G:C374T:C291A:G45A)))                                                                                      |
| 11953d16_9Aprint.1 | V23  | Laser | (~1:LV1J1;CTTTGG~(~0:A349T~1:G49A,(~1:A170G~1:G<br>106A:A157G,1:T150C,1:A183G,1:G145A:C296A:G170C))                                                                                |
| 11953d16_9Aprint.2 | V23  | Laser | 16 )                                                                                                                                                                               |
| 11953d16_9Aprint.3 | V23  | Laser | 16 (~1:LV1J1;CTTTGG~1:C345T:C335T:G238C:T219G)<br>(~1:LV1J1;CTTTGG~(~0:G319A~5:G158A,1:T219A:C121<br>16 T:G19C))                                                                   |
| L11929d16_1print.1 | V23  | Laser | 16 T:G19C))                                                                                                                                                                        |
| L11929d16_1print.2 | V23  | Laser | 16 (~1:LV1J1;CTTTGG~2:G232A)                                                                                                                                                       |
| L11930_3bprint.1   | V23  | Laser | (~1:LV1J1;CTTTGG~5:C352T:A349T:G312A:G301A:C22<br>16 1G:C201G)                                                                                                                     |
| L11930d16_3print.1 | V23  | Laser | (~1:LV1J1;CTTTGG~1:A349T:A339C:A303G:A164T:G49<br>16 A)                                                                                                                            |
| L11930d16_3print.2 | V23  | Laser | 16 (~1:LV1J1;CTTTGG~2:G232A:A170G)<br>(~1:LV1J1;ATTTGG~1:T393A:A349T:G347A:G217A:G158<br>16 C:A99T:G1A)                                                                            |
| L11930d16_3print.3 | V23  | Laser | 16 C:A99T:G1A)                                                                                                                                                                     |
| M1d10_2print.1     | B1-8 | Laser | 10 (~2:LV1J1;CACTGG~1:G158A:G45A)<br>(~3:E09+LV1J1;CATTGG~(~4:G158A~1:G218A,1:G271A)<br>10 )                                                                                       |
| M1d10_2print.2     | B1-8 | Laser | 10 )                                                                                                                                                                               |
| M1d10_2print.3     | B1-8 | Laser | 10 (~1:LV1J1;CATTGG~1:A258G)                                                                                                                                                       |
| M1d10_3print.2     | B1-8 | Laser | 10 (~4:F05+F12+LV1J1;CATTGG~2:G137A)                                                                                                                                               |
| M1d10_3print.3     | B1-8 | Laser | 10 (~1:LV1J1;CATTGG~1:G232C)                                                                                                                                                       |
| M1d10_3print.4     | B1-8 | Laser | 10 (~1:LV1J1;CATTGG~1:G19T)                                                                                                                                                        |
| M1d10_3print.5     | B1-8 | Laser | 10 (~1:LV1J1;CATTGG~1:G88T)                                                                                                                                                        |
| M1d10_3print.6     | B1-8 | Laser | 10 (~1:LV1J1;CATTGG~1:A211G)<br>(~4:A8+A10+LV1J1;CACTGG~1:A170G:G158A:G145A:C<br>10 140T)                                                                                          |
| M2.3_d10print.1    | B1-8 | Laser | 10 140T)                                                                                                                                                                           |
| M2.3_d10print.2    | B1-8 | Laser | 10 (~5:A6+A11+A12+LV1J1;CATTGG~1:C171T)                                                                                                                                            |
| M2.3_d10print.3    | B1-8 | Laser | 10 (~1:LV1J1;CATTGG~1:G67A)                                                                                                                                                        |
| M2.3_d10print.4    | B1-8 | Laser | 10 (~1:LV1J1;CATTGG~1:G175A)                                                                                                                                                       |

|                   |      |       |                                                                                                                                                                                                                                     |
|-------------------|------|-------|-------------------------------------------------------------------------------------------------------------------------------------------------------------------------------------------------------------------------------------|
| M3d10_1print.1    | B1-8 | Laser | 10 (~1:LV1J1;CACTGG~1:C167G:G158A)                                                                                                                                                                                                  |
| M3d10_1print.2    | B1-8 | Laser | 10 (~1:LV1J1;CATTGG~5:G158A)                                                                                                                                                                                                        |
| M3d10_1print.3    | B1-8 | Laser | 10 (~1:LV1J1;CATTGG~1:A154G:G70A)<br>(~1:LV1J1;CATTGG~(~1:C221T:T195A:T133G:T59C~(~2:                                                                                                                                               |
| M3d10_1print.4    | B1-8 | Laser | 10 G158A:T159G~1:G342T)))<br>(~2:LV1J1;CACTGG~(~0:G158A~2:A164T:A160T:G137A,                                                                                                                                                        |
| M3d10_2print.1    | B1-8 | Laser | 10 2:G347A:C233G:A153G:G148A))<br>(~2:LV1J1;CATTGG~(~1:C233T:C225T:T204C~1:T159G)                                                                                                                                                   |
| M3d10_2print.2    | B1-8 | Laser | 10 )<br>(~1:LV1J1;CGCTGG~(~0:G342A~1:G301A:A80G,1:C121                                                                                                                                                                              |
| M3d10_2print.3    | B1-8 | Laser | 10 T))                                                                                                                                                                                                                              |
| M3d10_2print.4    | B1-8 | Laser | 10 (~1:LV1J1;CATTGG~1:C330A)                                                                                                                                                                                                        |
| M3d10_2print.5    | B1-8 | Laser | 10 (~1:LV1J1;CATTGG~1:G274T)<br>(~1:LV1J1;CATGGG~1:G347A:T343A:C167T:A164T:G15                                                                                                                                                      |
| M1.1_d16print.1   | B1-8 | Laser | 16 8A)<br>(~1:LV1J1;CATTGG~(~5:C345T:A303G:C225A~1:G342C,                                                                                                                                                                           |
| M1.1_d16print.2   | B1-8 | Laser | 16 )))<br>(~1:LV1J1;CATTGG~(~1:A164T:G158A~1:G334A:T323C:<br>G312A,1:C255T,(~1:C155G~1:C337G),1:G358A,1:A369C,                                                                                                                      |
| M1.2_d16print.1   | B1-8 | Laser | 16 1:C335T:G241A:G67T:G49A))                                                                                                                                                                                                        |
| M1.2_d16print.2   | B1-8 | Laser | 16 (~1:LV1J1;CATTGG~1:A322C:A213G)<br>(~1:LV1J1;CATTGG~(~0:G347A:G158A~1:C171T:C155A,<br>(~0:A164T~1:A202T:A139T:A135T,(~1:G145A~1:A112G:<br>16 A346T:C155G:G67A,1:A268C:A339C)))<br>(~1:LV1J1;CATTGG~1:A344G:A324G:A297C:G232C:C22 |
| M1.3_d16print.1   | B1-8 | Laser | 16 8A:A154C)                                                                                                                                                                                                                        |
| M1.3_d16print.2   | B1-8 | Laser | 16 (~1:LV1J1;CATTGG~4:C225A:A160T:G148A)<br>(~1:LV1J1;CATTGG~1:A344G:A324G:A297C:G232C:C22                                                                                                                                          |
| M1.3_d16print.4   | B1-8 | Laser | 16 8A:A154C)                                                                                                                                                                                                                        |
| M1.3_d16print.5   | B1-8 | Laser | 16 (~1:LV1J1;CATTGG~1:G347A:C171T:G158A:C155A)<br>(~1:LV1J1;CACTGG~1:G347C:A339C:G267A:G232C:G6                                                                                                                                     |
| M2.6_day16print.1 | B1-8 | Laser | 16 7T)<br><br>(~1:LV1J1;CACTGG~(~0:A164T:G158A~(~0:A139G:A90                                                                                                                                                                        |
| M2.6_day16print.2 | B1-8 | Laser | 16 C~1:C335G,1:C354G:C351T:G319A:C5G),1:C140T))                                                                                                                                                                                     |
| M2.6_day16print.3 | B1-8 | Laser | 16 (~1:LV1J1;CATTGG~(~1:C235T~1:A157C))<br>(~1:LV1J1;CATTGG~(~0:A164T:G158A~1:G347A:A339T:<br>C337A:C335G:A210C:C201T:G137A:C79T:C77T,1:A344                                                                                        |
| M2.6_day16print.4 | B1-8 | Laser | 16 C))<br>(~1:LV1J1;CATTGG~(~0:A164T:G158A~1:G239T:G232A,<br>1:A213C,(~1:G347A~1:C294A:T359C:G218C:G137C),(~2<br>:G148A~1:T323A),1:A321G:G301A:C233G:C117T,1:C162                                                                   |
| M2.7_d16print.1   | B1-8 | Laser | 16 T:G1A))                                                                                                                                                                                                                          |
| M2.7_d16print.2   | B1-8 | Laser | 16 (~1:LV1J1;CATTGG~2:G301C:A223T:A139T)<br>(~1:LV1J1;CACTGG~(~0:G158A~2:C155G,(~1:A154T~1:<br>A164T,1:A111C),(~1:T150G:A139G~(~1:T156A:C167G~1                                                                                     |
| M3.1_d16print.1   | B1-8 | Laser | 16 :C375A))))                                                                                                                                                                                                                       |

|                 |      |                   |                                                                                                                                                                                                                                                                                        |
|-----------------|------|-------------------|----------------------------------------------------------------------------------------------------------------------------------------------------------------------------------------------------------------------------------------------------------------------------------------|
| M3.1_d16print.2 | B1-8 | Laser             | (~1:LV1J1;CATTGG~(~0:G158A~1:C155G,(~0:C233T:C1<br>16 67T~1:G145A:A22G,1:G274T:A164T)))                                                                                                                                                                                                |
| M3.1_d16print.3 | B1-8 | Laser             | 16 (~1:LV1J1;CATTGG~1:A303G:G232C:G55A)<br>(~1:LV1J1;CATTGG~(~0:G158A~2:C155A:G145A,1:A223<br>T,1:G347A:G319A:G247C:G205A:G181A,(~0:A164T~(~0:<br>C140A~1:G232A:A210G:C162T:T159A,1:C155G:A120T),<br>1:A311G,1:G232T:A220G:A184G:C155G,1:A224G,1:C23<br>16 3G:A154T:A153T:A139T:T4G))) |
| M3.2_d16print.1 | B1-8 | Laser             | 16 (~1:LV1J1;CATTGG~1:G215C:T159C)                                                                                                                                                                                                                                                     |
| M3.2_d16print.2 | B1-8 | Laser             | 16 (~1:LV1J1;CATTGG~1:G347A:A295G:G251C)                                                                                                                                                                                                                                               |
| M3.2_d16print.3 | B1-8 | Laser             |                                                                                                                                                                                                                                                                                        |
| M3.3_d16print.1 | B1-8 | Laser             | (~3:G2+LV1J1;CATTGG~(~1:A164T:G158A~(~2:G49A~(~<br>16 2:A118T~1:G367A),1:G232A:A154T:A139T:A102T)))                                                                                                                                                                                    |
| M3.3_d16print.2 | B1-8 | Laser             | 16 (~1:LV1J1;CATTGG~1:G1A)<br>(~1:LV1J1;CACTGG~(~0:G158A:A124T~1:A372G:G347A,<br>10 (~5:A349T~1:A170G,3:T163A:C348A,1:G259T)))                                                                                                                                                         |
| L3N1o.nex.1     | V23  | Micromanipulation | 10 (~1:LV1J1;CATTGG~1:A252G:G158A:A124T)                                                                                                                                                                                                                                               |
| L3N1o.nex.2     | V23  | Micromanipulation | (~1:LV1J1;CTTTGG~(~0:A349T~1:G55A,(~1:A227T:A157<br>10 G~(~0:G145A~1:A90T,1:C352A)))                                                                                                                                                                                                   |
| L3So.nex.1      | V23  | Micromanipulation | 10 (~1:LV1J1;CATTTCCGGCTGG~1:C357T:C221A)                                                                                                                                                                                                                                              |
| L3To.nex.2      | V23  | Micromanipulation | 10 (~4:REVB11+REVB12+LV1J1;CTTTGG~1:G347A)                                                                                                                                                                                                                                             |
| L3To.nex.3      | V23  | Micromanipulation | 10 (~1:LV1J1;CTTTGG~1:G218A)                                                                                                                                                                                                                                                           |
| L3To.nex.4      | V23  | Micromanipulation | 10 (~1:LV1J1;CTTTGG~1:C265T)                                                                                                                                                                                                                                                           |
| L3To.nex.5      | V23  | Micromanipulation | 10 (~1:LV1J1;CTTTGG~8:G232A:C162A)                                                                                                                                                                                                                                                     |
| L4Uo.nex.1      | V23  | Micromanipulation | 10 (~1:LV1J1;CTTTGG~(~2:C335G~1:G218A))                                                                                                                                                                                                                                                |
| L4Vo.nex.2      | V23  | Micromanipulation | (~9:REVD03+REVD04+REVD06+REVD07+REVD09+D11<br>+REVD12+LV1J1;CATTTCCGGCTGG~1:C221T:C155T:A3<br>10 4C)                                                                                                                                                                                   |
| L5G1o.nex.1     | V23  | Micromanipulation | (~1:LV1J1;CATTGG~(~3:A349T:G347A:A186C:A183G:G7<br>0A~1:T6A:C284T:T240A,(~2:C228A~1:C155G:G298C),3:<br>10 A139G:G148T:A26C,1:A372G,1:C248T))                                                                                                                                           |
| L5G2o.nex.1     | V23  | Micromanipulation | (~2:LV1J1;CATTTCCGGCTGG~4:A311C:A161C,2:C248T:<br>10 A151T,1:C255A)                                                                                                                                                                                                                    |
| L5G3o.nex.1     | V23  | Micromanipulation | (~1:LV1J1;CCCGGCAGCTGG~2:G280T,2:G334T,(~1:G3<br>10 47T~1:A164T:G148A:G88A),1:T323C:A322C)                                                                                                                                                                                             |
| L6Xo.nex.1      | V23  | Micromanipulation | 10 (~1:LV1J1;CATTTG~1:A164T)                                                                                                                                                                                                                                                           |
| L6Xo.nex.2      | V23  | Micromanipulation | (~2:LV1J1;CATGGGGGCTGG~1:G137A,1:A223T:T150A:<br>16 G88A,(~0:G49A~1:G241A,1:A353C:G232A))                                                                                                                                                                                              |
| L1Mo.nex.1      | V23  | Micromanipulation | (~1:LV1J1;CTTTGG~1:C352G:G347A:G298C:G232A:A16<br>16 4C:G49A)                                                                                                                                                                                                                          |
| L1Mo.nex.3      | V23  | Micromanipulation | (~1:LV1J1;CTTTGG~1:G347C:G232T:A224G:C221T:C18<br>16 7A:A170C:C162T)                                                                                                                                                                                                                   |
| L1No.nex.1      | V23  | Micromanipulation | 16 (~1:LV1J1;ATTTGG~1:A349T:T159C:A157G:A90G)                                                                                                                                                                                                                                          |
| L1No.nex.2      | V23  | Micromanipulation | (~1:LV1J1;CTTTGG~(~3:A349T~1:G232C,1:C86A:G241C<br>16 :A226C,1:C162T))                                                                                                                                                                                                                 |
| L1Oo.nex.1      | V23  | Micromanipulation | 16 (~1:LV1J1;CATTGG~1:A344T)                                                                                                                                                                                                                                                           |
| L1Oo.nex.2      | V23  | Micromanipulation | (~1:LV1J1;CTTTGG~(~1:A349T~(~1:A170G~1:G283A),(~<br>1:A170C~1:G283A:C352A:C351T:A198T:C140T),(~1:C15<br>16 5A:T156A~(~0:G137A~1:G301A,1:T219C)))                                                                                                                                       |
| L2Po.nex.1      | V23  | Micromanipulation |                                                                                                                                                                                                                                                                                        |

|             |      |                   |                                                                                                                                                                                                                               |
|-------------|------|-------------------|-------------------------------------------------------------------------------------------------------------------------------------------------------------------------------------------------------------------------------|
| L2Q.nex.1   | V23  | Micromanipulation | (~1:LV1J1;ATTTGG~(~1:A349T:A322G~1:T150G:C187T,(<br>~0:A170C~1:G137A,1:C152T,1:C233T:T219G:G70A),1:A<br>16 185G:G239C:G238A:A194G,1:C140T:C348T))<br>(~1:LV1J1;CTCTGG~(~1:C77T~(~1:C345T~(~0:C140T~2:<br>16 C225T,1:A339G)))) |
| L2Ro.nex.1  | V23  | Micromanipulation | (~1:LV1J1;CTCTGG~1:C276A:G260C:G232A:A220T:A21<br>16 3G:A90T:T60A)                                                                                                                                                            |
| L2Ro.nex.2  | V23  | Micromanipulation | 16 (~1:LV1J1;CTCTGG~1:C345T)                                                                                                                                                                                                  |
| L2Ro.nex.3  | V23  | Micromanipulation | 16 (~1:LV1J1;CTCTGG~4:A349T)                                                                                                                                                                                                  |
| NP1p.1      | V23  | Micromanipulation | (~3:SF03_021+LV1J1;ATTTGG~(~1:G342C:G247A~1:G3<br>16 41A))                                                                                                                                                                    |
| NP1p.2      | V23  | Micromanipulation | 16 (~2:LV1J1;CTCTGG~4:G232A)                                                                                                                                                                                                  |
| NP2p.1      | V23  | Micromanipulation | 16 (~1:LV1J1;ATTTGG~1:T219C:C155T)                                                                                                                                                                                            |
| NP2p.2      | V23  | Micromanipulation | 16 (~1:LV1J1;CTCTGG~1:A324T:C155T:C152T)                                                                                                                                                                                      |
| NP2p.3      | V23  | Micromanipulation | (~1:LV1J1;ATTTGG~(~0:A349T~1:T354C,1:G347A:A324<br>16 T,1:G232A:A139G))                                                                                                                                                       |
| NP7p.1      | V23  | Micromanipulation | (~5:REVB07+REVB08+REVB12+LV1J1;CATTGG~1:G31<br>10 2A:T212G)<br>(~5:ASKH+REVC04+REVC08+LV1J1;CATTGG~2:G347T:<br>10 G319C)                                                                                                      |
| M1A1o.nex.1 | B1-8 | Micromanipulation | 10 (~1:LV1J1;CATTGG~1:G70A:G67A)                                                                                                                                                                                              |
| M1A2.nex.1  | B1-8 | Micromanipulation | 10 (~2:LV1J1;CATTGG~1:C335T)                                                                                                                                                                                                  |
| M1A2.nex.2  | B1-8 | Micromanipulation | 10 (~1:LV1J1;CATTGG~1:A161G)                                                                                                                                                                                                  |
| M1Bo.nex.1  | B1-8 | Micromanipulation | 10 (~1:LV1J1;CATTGG~1:G66T)                                                                                                                                                                                                   |
| M1Bo.nex.2  | B1-8 | Micromanipulation | 10 (~1:LV1J1;CATTGG~1:A237T)                                                                                                                                                                                                  |
| M1Bo.nex.3  | B1-8 | Micromanipulation | 10 (~1:LV1J1;CATTGG~1:A183C:A164T:G158A)                                                                                                                                                                                      |
| M1Bo.nex.4  | B1-8 | Micromanipulation | 10 (~1:LV1J1;CATTGG~1:A213G)                                                                                                                                                                                                  |
| M1Bo.nex.5  | B1-8 | Micromanipulation | 10 (~1:LV1J1;CACTGG~1:T150C:C119T:A110G)                                                                                                                                                                                      |
| M1Bo.nex.6  | B1-8 | Micromanipulation | (~6:REVF07+REVF09+REVF10+REVF11+LV1J1;CATTG<br>10 G~1:A350C:C335T)                                                                                                                                                            |
| M2Co.nex.1  | B1-8 | Micromanipulation | 10 (~1:LV1J1;CATTGG~1:A273G)                                                                                                                                                                                                  |
| M2Co.nex.2  | B1-8 | Micromanipulation | 10 (~2:LV1J1;CATTGG~1:T343A:T333C:T147G)                                                                                                                                                                                      |
| M2Co.nex.3  | B1-8 | Micromanipulation | 10 (~1:LV1J1;CATTGG~1:C56T)                                                                                                                                                                                                   |
| M2Co.nex.4  | B1-8 | Micromanipulation | (~5:REVG11+REVH01+REVH03+LV1J1;CATTGG~(~1:G<br>10 272C~1:A202T:C233T))                                                                                                                                                        |
| M3Eo.nex.1  | B1-8 | Micromanipulation | 10 (~1:LV1J1;CATTGG~2:G318T)                                                                                                                                                                                                  |
| M3Eo.nex.2  | B1-8 | Micromanipulation | (~1:LV1J1;CATTGG~(~0:A227T~1:A292T,1:G316T:G301<br>10 A))                                                                                                                                                                     |
| M3Fo.nex.2  | B1-8 | Micromanipulation | 10 (~1:LV1J1;CATTGG~1:A275C:G232A:A157C)                                                                                                                                                                                      |
| M3Fo.nex.3  | B1-8 | Micromanipulation | 10 (~1:LV1J1;CATTGG~1:G218T:A213T)                                                                                                                                                                                            |
| M3Fo.nex.4  | B1-8 | Micromanipulation | 10 (~1:LV1J1;CACTGG~(~2:G137A~1:A324G:G347C))                                                                                                                                                                                 |
| M7B1o.nex.1 | B1-8 | Micromanipulation | (~3:REVH12+LV1J1;CATTGG~(~1:G145A:A139C~1:G15<br>10 8A:T133C:T21C))                                                                                                                                                           |
| M7B1o.nex.2 | B1-8 | Micromanipulation | 10 (~1:LV1J1;CATTGG~1:A369G:G137A)                                                                                                                                                                                            |
| M7B1o.nex.3 | B1-8 | Micromanipulation | 10 (~1:LV1J1;CATTGG~(~1:G241A~1:A344C))                                                                                                                                                                                       |
| M7B1o.nex.4 | B1-8 | Micromanipulation | 10 (~1:LV1J1;CACTGG~(~1:G312A:G174A~1:A349G))                                                                                                                                                                                 |
| M7B2o.nex.1 | B1-8 | Micromanipulation | 10 (~1:LV1J1;CATTGG~3:T343A)                                                                                                                                                                                                  |
| M7B2o.nex.2 | B1-8 | Micromanipulation | 10 (~1:LV1J1;CATTGG~1:C233T)                                                                                                                                                                                                  |
| M7B2o.nex.3 | B1-8 | Micromanipulation | 10 (~1:LV1J1;CATTGG~1:T156A:C140T)                                                                                                                                                                                            |
| M7B2o.nex.4 | B1-8 | Micromanipulation |                                                                                                                                                                                                                               |



|                |      |                   |                                                                                                                                                      |
|----------------|------|-------------------|------------------------------------------------------------------------------------------------------------------------------------------------------|
| M7B2o.nex.5    | B1-8 | Micromanipulation | 10 (~1:LV1J1;CATTGG~1:A223T:G67A:G66A)                                                                                                               |
| M7B2o.nex.6    | B1-8 | Micromanipulation | 10 (~1:LV1J1;CATTGG~1:G232C)<br>(~1:LV1J1;CATTGG~1:C335T:G334A:A224C:G158C:G14                                                                       |
| M7B2o.nex.7    | B1-8 | Micromanipulation | 10 8A)<br>(~2:LV1J1;CATTGG~(~2:A295T~2:A344T:A350G,1:A154                                                                                            |
| M4_d16Hprint.1 | B1-8 | Micromanipulation | 16 G:C265A,1:G301A))<br>(~3:REVA04+LV1J1;CATTGG~(~0:A339G~1:G347A,1:C3<br>45T:C335T:G232C,(~0:A139G:A112T~2:A111T,1:A164T:                           |
| M4G_print.1    | B1-8 | Micromanipulation | 16 G158A)))                                                                                                                                          |
| M4G_print.2    | B1-8 | Micromanipulation | 16 (~1:LV1J1;CATTGG~1:A164T:G158A)                                                                                                                   |
| M5I.nex.1      | B1-8 | Micromanipulation | 16 (~1:LV1J1;CACTGG~1:G347T:T343C:C244T:G241A)<br>(~2:LV1J1;CATTGG~(~0:G158A~1:A231C:A210G:A164T:<br>G137A,1:G148A:G145T,1:C167T:A58G,1:G301A:G232C: |
| M5I.nex.2      | B1-8 | Micromanipulation | 16 G215T:T199C:A183G:C162T:A157C:C155G))                                                                                                             |
| M5I.nex.3      | B1-8 | Micromanipulation | 16 (~1:LV1J1;CACTGG~1:G232C)<br>(~3:REVC03+LV1J1;CATTGG~(~0:G145A~1:A186C,1:G2                                                                       |
| M5Jo.nex.1     | B1-8 | Micromanipulation | 16 32A:A224G:T209C))                                                                                                                                 |
| M5Jo.nex.2     | B1-8 | Micromanipulation | 16 (~1:LV1J1;CATTGG~1:G45C)                                                                                                                          |
| M5Jo.nex.3     | B1-8 | Micromanipulation | 16 (~1:LV1J1;CATTGG~1:T209C:T74G)                                                                                                                    |
| M5Jo.nex.4     | B1-8 | Micromanipulation | 16 (~1:LV1J1;CATTGG~1:A373G)                                                                                                                         |
| M6Ko.nex.1     | B1-8 | Micromanipulation | 16 (~4:REVC12+REVD04+LV1J1;CATTGG~1:C103A)                                                                                                           |
| M6Ko.nex.2     | B1-8 | Micromanipulation | 16 (~1:LV1J1;CATTGG~(~1:C233T:C225T~1:C155G))                                                                                                        |
| M6Ko.nex.3     | B1-8 | Micromanipulation | 16 (~1:LV1J1;CATTGG~1:G232C:A164T:G158A)                                                                                                             |
| M6Ko.nex.4     | B1-8 | Micromanipulation | 16 (~1:LV1J1;CATTGG~1:G148A)                                                                                                                         |

Listed are all the lineage trees identified among the sequences from all picks. The first columns are descriptive information on the origins of each tree. In order to represent all of the trees, we are using the following notation: (~node information~(daughters information)) and so on recursively. The first node is the “germline sequence node”, which starts ‘~’, followed by the number of sequences that are unmutated, then ‘.’ and the names of the un-mutated sequences. If there are no unmutated sequences only the name of the specific V and J assumed to make the germline sequences is listed. Following the germline name there is a ‘;’ and the the exact nucleotide sequence which was determined to be the junction at the base of the clone. Following this is: ‘~’ and the number of sequences in a node, a ‘.’ and then the original nucleotide that underwent mutation, position of mutation, and mutated nucleotide. If there are several mutations all shared by the same sequence they are separated by ‘.’. Sequences that have different mutations after a common ancestor are separated by ‘,’.

## Supplementary Table 2: Optimal Model Fits

|              | Parameter | Description                   | Optimal Values <sup>1</sup> |                   | Constraints <sup>3</sup>                      |
|--------------|-----------|-------------------------------|-----------------------------|-------------------|-----------------------------------------------|
|              |           |                               | Basic Model                 | In/Out-flow Model |                                               |
| B1-8         | p         | Proliferation rate            | 0.04                        | 0.11              | $p \leq 0.12$                                 |
|              | $s_{out}$ | Outflow of cells              | -- <sup>2</sup>             | 0.03              | $s_{in} \geq 0$ or $s_{out} \geq 0$           |
|              | $d_B$     | Non-dividing cell death rate  | 0.05                        | 0.02              |                                               |
|              | r         | Re-entry rate                 | 0.05                        | 0.05              | $r = (d_B + s_{out}) * (p + d_A) / (p - d_A)$ |
| V23          | p         | Proliferation rate            | 0.12                        | 0.12              | $p \leq 0.12$                                 |
|              | $s_{in}$  | Outflow of cells              | -- <sup>2</sup>             | 0.06              | $s_{in} \geq 0$ or $s_{out} \geq 0$           |
|              | $d_B$     | Non-dividing cell death rate  | 0.11                        | 0.06              |                                               |
|              | r         | Re-entry rate                 | 0.11                        | 0.11              | $r = (d_B + s_{out}) * (p + d_A) / (p - d_A)$ |
| B1-8 and V23 | $L_r$     | Labeling rate                 | 2.00                        | 3.50              | $L_r \geq 2.00$                               |
|              | $L_t$     | Labeling period (hours)       | 0.41                        | 0.50              | $L_t \leq 0.50$                               |
|              | $\alpha$  | Apoptotic cell clearance rate | 0.16                        | 0.11              | $0.08 \leq \alpha \leq 1.30$                  |

<sup>1</sup> All rates are per hour, unless otherwise noted in description

<sup>2</sup> Basic model does not include in/out-flow ( $s_{in} = 0$  and  $s_{out} = 0$ )

<sup>3</sup> The constraint on r was only used for models with  $s_{in} = 0$
